# Supplementary material for: A dual‐AAV approach restores fast exocytosis and partially rescues auditory function in deaf otoferlin knock‐out mice
Source: PubMed Central journal article supplement (PMC6328916; doi:10.15252/emmm.201809396), 2018-12-03
Supplement: EMMM-11-e9396-s001.pdf [file EMMM-11-e9396-s001.pdf]

## Appendix

for

### ***A dual-AAV approach restores fast IHC exocytosis and partially rescues auditory function in deaf otoferlin knock-out mice***

Hanan Al-Moyed<sup>1,2</sup>, Andreia P. Cepeda<sup>1,2</sup>, Sangyong Jung<sup>3,4</sup>, Tobias Moser<sup>2,3,4</sup>, Sebastian Kügler<sup>5,\*</sup>, Ellen Reisinger<sup>1,\*</sup>

#### **Table of content**

**Appendix Figure S1** - Contralateral non-injected *Otof*<sup>-/-</sup> ears do not show dual-AAV mediated eGFP and otoferlin expression

**Appendix Figure S2** - OHCs and IHCs from contralateral non-injected *Otof*<sup>-/-</sup> ears do not show dual-AAV mediated eGFP and otoferlin expression

**Appendix Figure S3** - OHCs were sparsely transduced with dual-AAV vectors.

**Appendix Figure S4** - Otoferlin dual-AAV-TS injected and non-injected contralateral ears of wild-type mice did not differ in ABR thresholds and wave latencies.

**Appendix Table S1** – Statistical tests and *P*-values

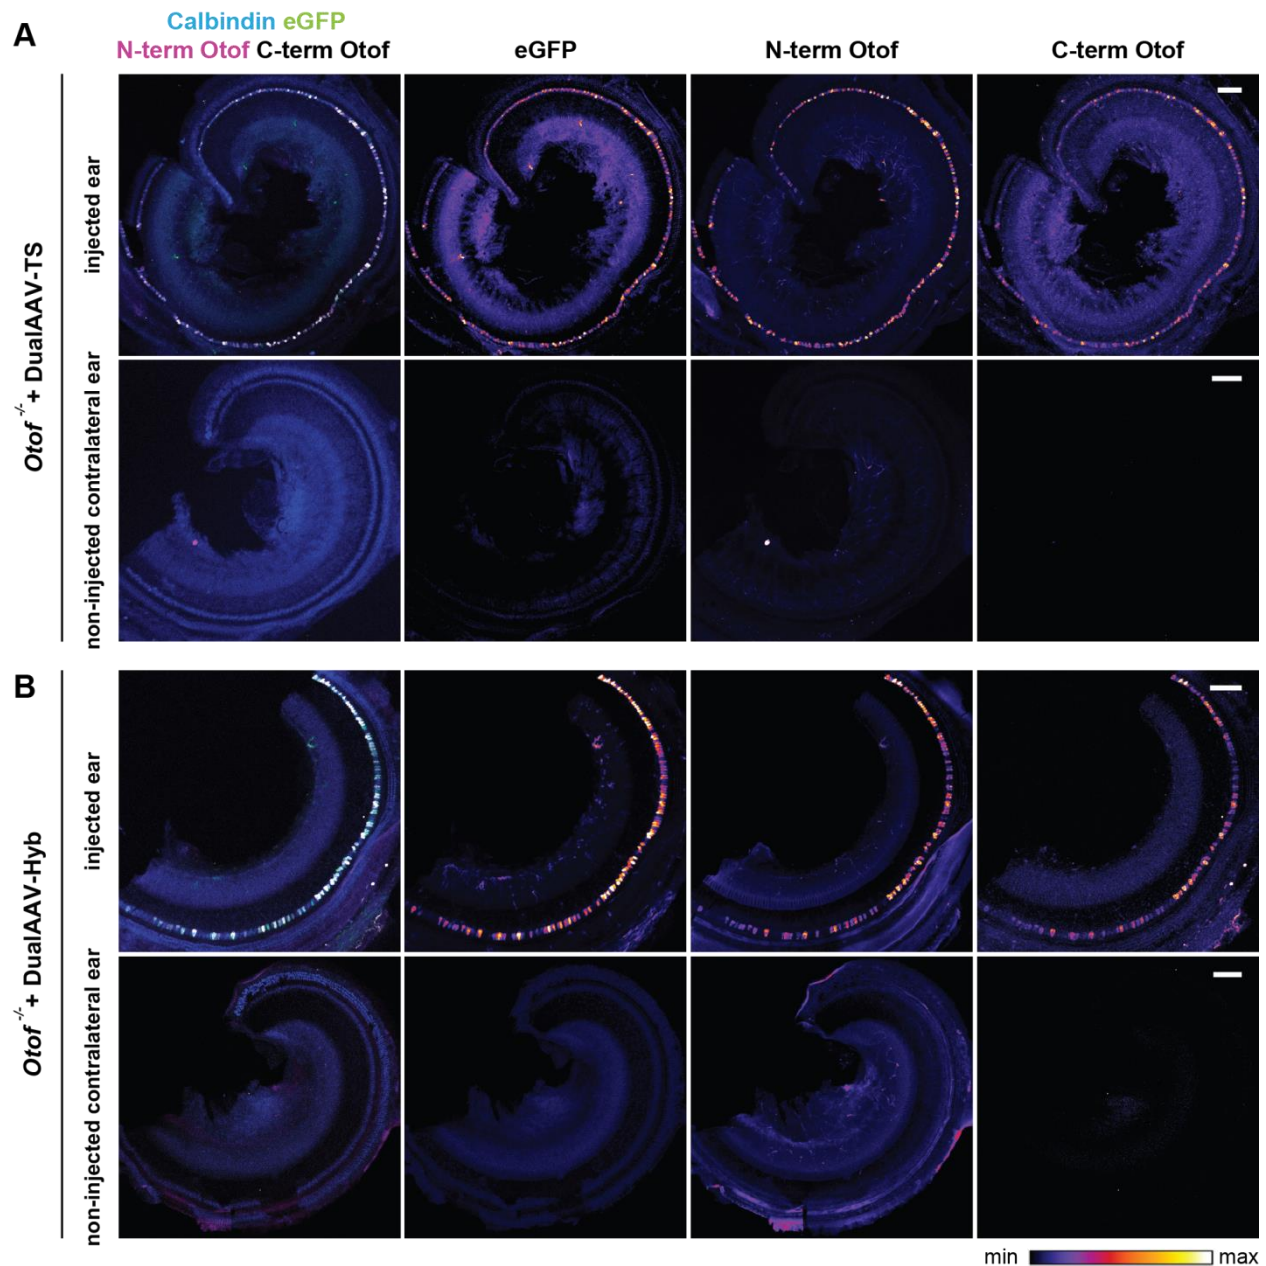

**Appendix Figure S1 - Contralateral non-injected *Otof*<sup>-/-</sup> ears do not show dual-AAV mediated eGFP and otoferlin expression**

**A,B** Low magnification views of organs of Corti from two CD1B6F1 *Otof*<sup>-/-</sup> mice treated with either otoferlin dual-AAV-TS (**A**; P28) or dual-AAV-Hyb (**B**; P26) half vectors. Both injected (**upper panels**) and contralateral non-injected ears (**lower panels**) of these animals were processed in parallel and acquired and displayed with the same settings. Organs of Corti were co-immunolabeled for calbindin (blue), eGFP (green), and the N-terminal (magenta) and C-terminal (white) part of otoferlin. Individual eGFP, N-terminal otoferlin, and C-terminal otoferlin immunostainings are depicted as color lookup tables with warmer colors representing higher pixel intensities. Maximum intensity projections of optical confocal sections. Scale bars: 100  $\mu$ m.

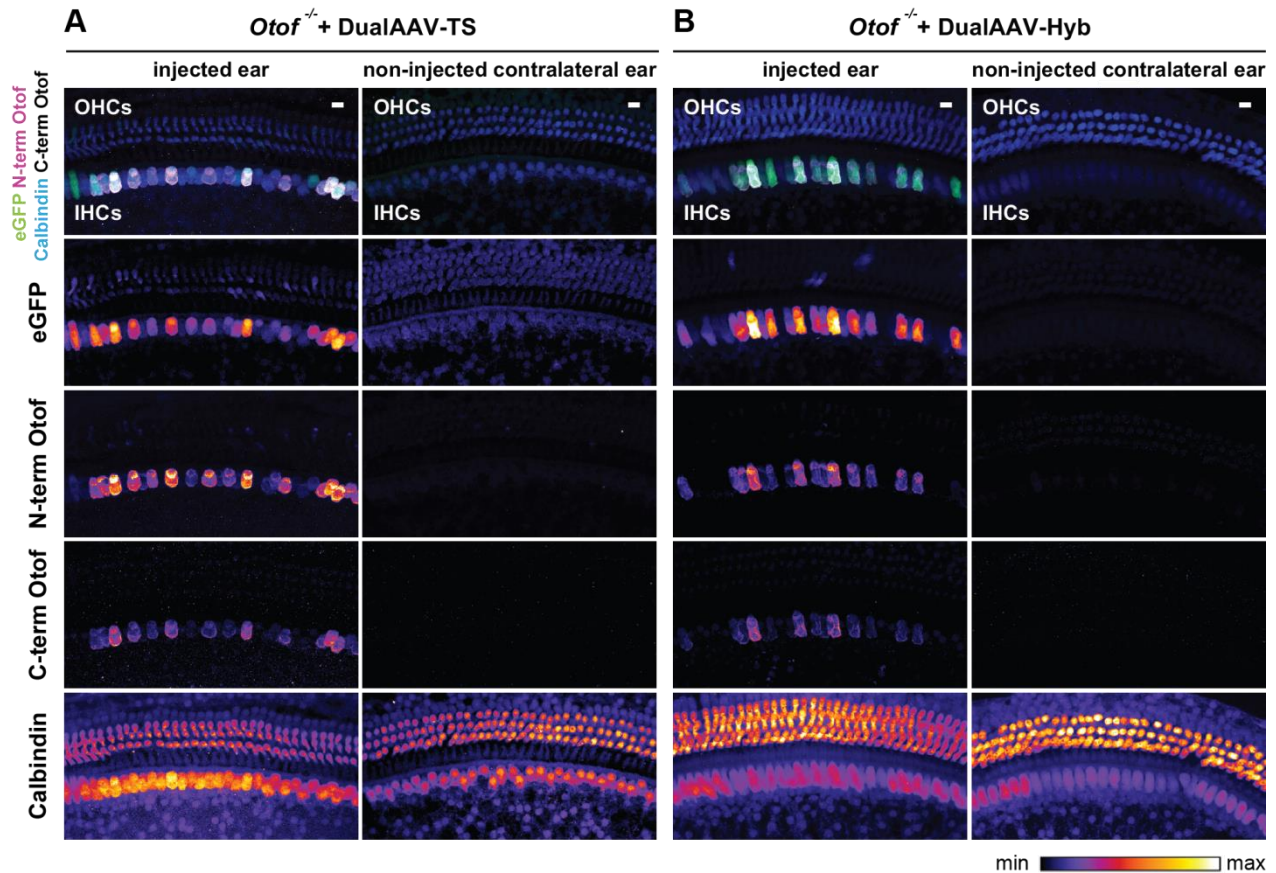

**Appendix Figure S2 - OHCs and IHCs from contralateral non-injected *Otof*<sup>-/-</sup> ears do not show dual-AAV mediated eGFP and otoferlin expression**

**A,B** Higher magnification views of **Appendix Fig S1** showing OHCs and IHCs from two CD1B6F1 *Otof*<sup>-/-</sup> mice treated with either otoferlin dual-AAV-TS (**A**; P28) or dual-AAV-Hyb (**B**; P26) half vectors. Both injected (**left panels**) and contralateral non-injected ears (**right panels**) of these animals were processed in parallel and acquired and displayed with the same settings. Organs of Corti were co-immunolabeled for eGFP (green) and the N-terminal (magenta) and C-terminal (white) part of otoferlin. OHCs and IHCs were visualized via calbindin immunostaining (blue). Individual eGFP, N-terminal otoferlin, and C-terminal otoferlin immunostainings are depicted as color lookup tables with warmer colors representing higher pixel intensities. Maximum intensity projections of optical confocal sections. IHCs: inner hair cells, OHCs: outer hair cells. Scale bars: Scale bars: 10  $\mu$ m.

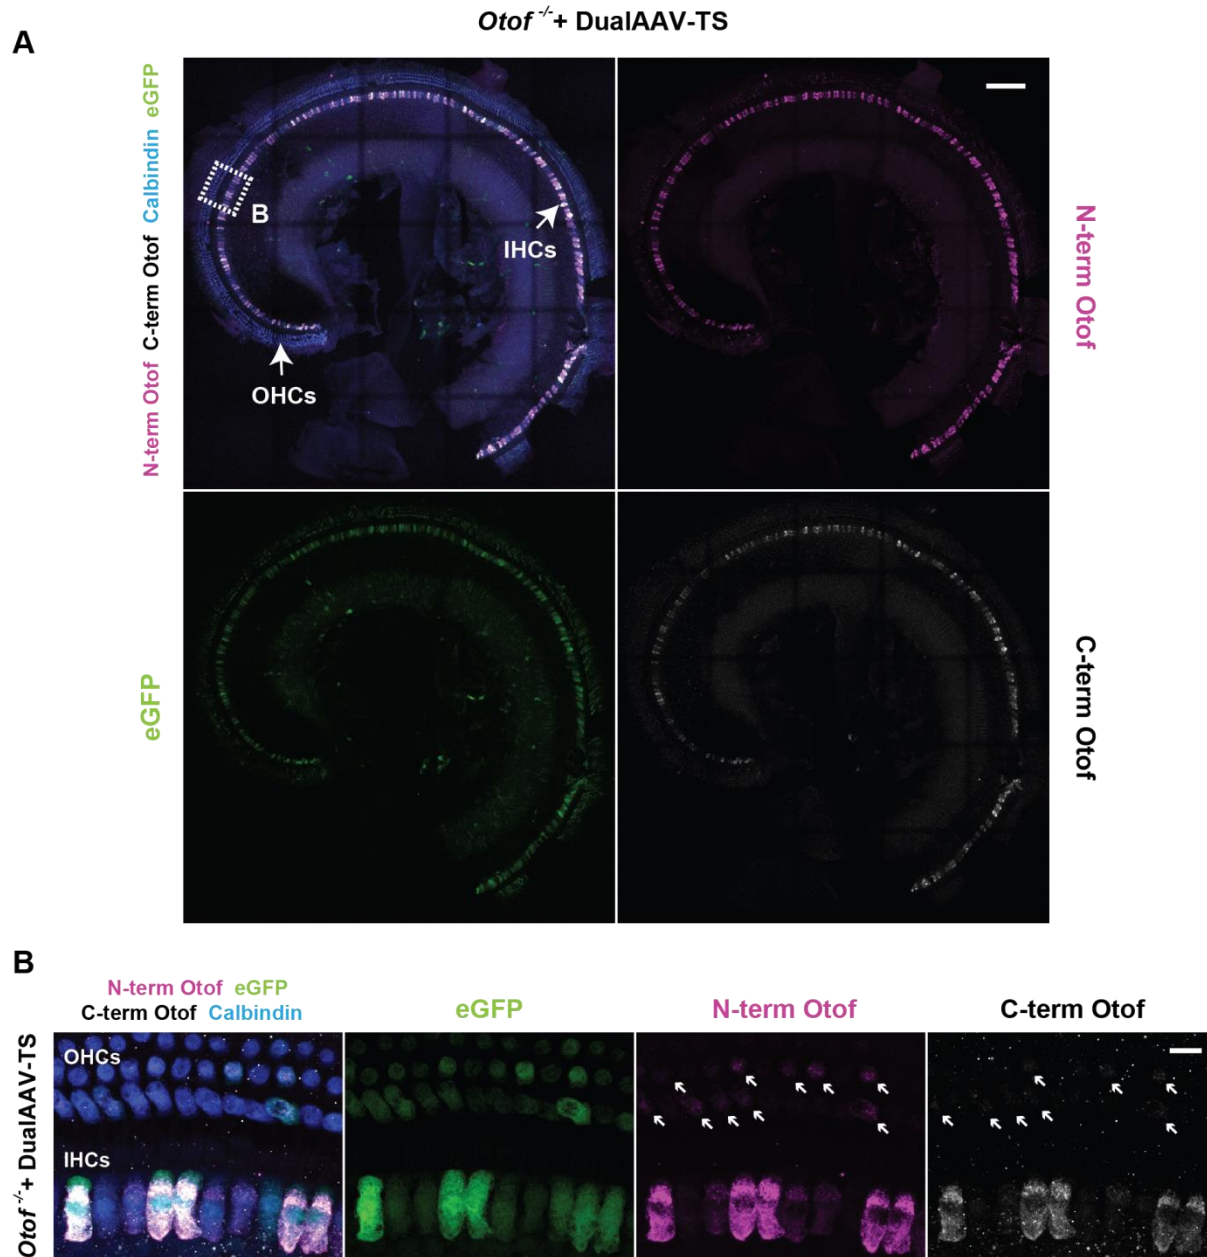

**Appendix Figure S3 – OHCs were sparsely transduced with dual-AAV vectors.**

**A** Low magnification views of a CD1 *Otof*<sup>-/-</sup> organ of Corti (P23) depicted in **Fig 1A** transduced with otoferlin dual-AAV-TS half vectors. The organ of Corti was co-immunolabeled for calbindin (blue), eGFP (green), and the N-terminal (magenta) and C-terminal (white) part of otoferlin.

**B** Higher magnification views of (**A**) showing OHCs expressing eGFP (green) and otoferlin (magenta, white, arrows) and IHCs transduced with otoferlin dual-AAV-TS half vectors.

Data information: Maximum intensity projections of optical confocal sections. IHCs: inner hair cells, OHCs: outer hair cells. Scale bars: 100 $\mu$ m (A), 10  $\mu$ m (B).

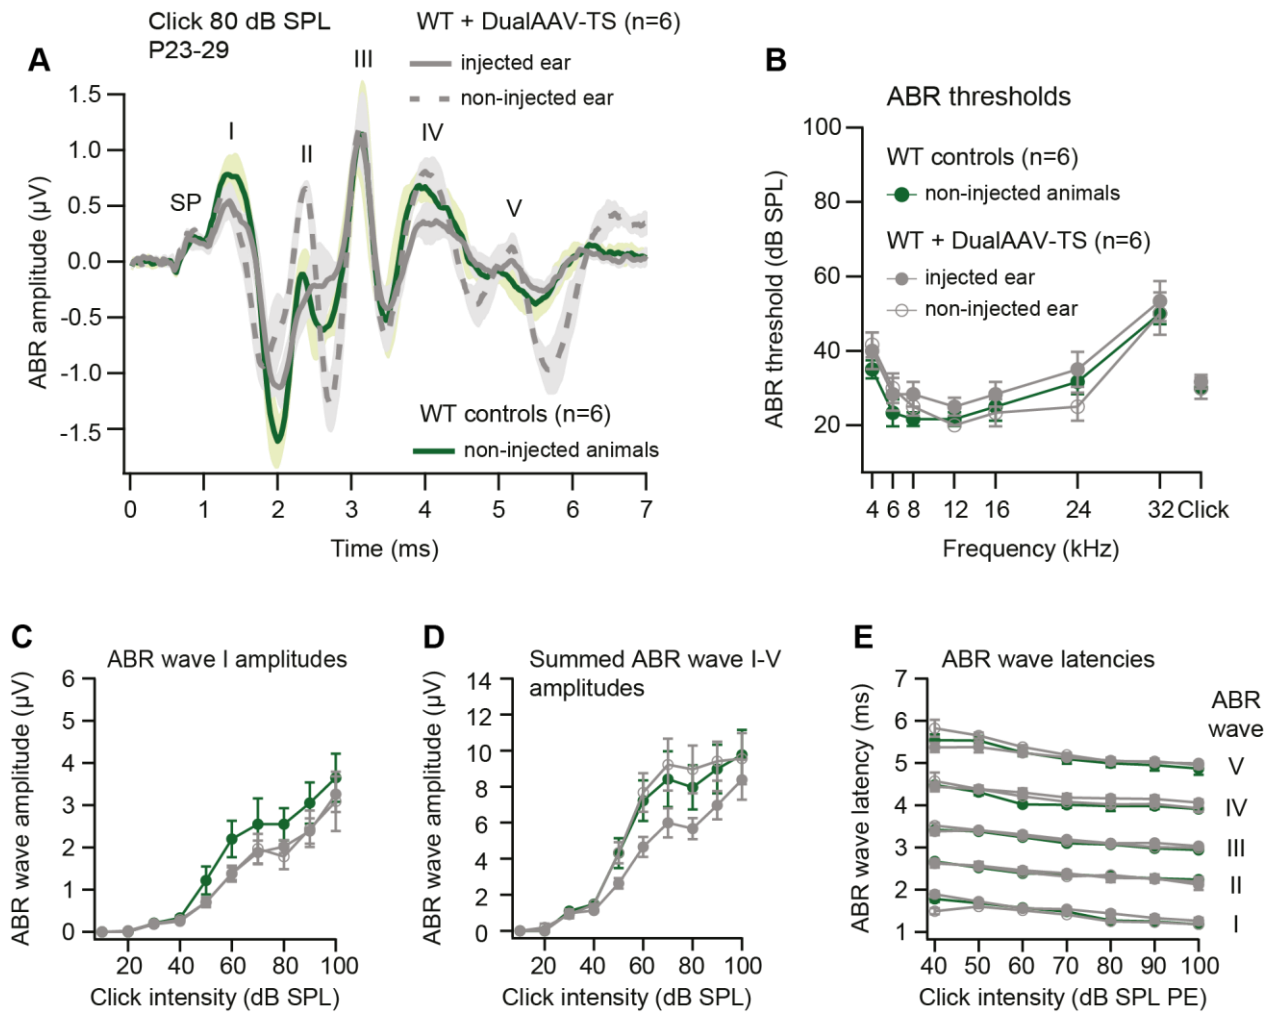

**Appendix Figure S4 - Otofelin dual-AAV-TS injected and non-injected contralateral ears of wild-type mice did not differ in ABR thresholds and wave latencies.**

**A** Average ABR wave responses to 80dB SPL broadband click sound stimuli in otofelin dual-AAV-TS injected and contralateral non-injected ears of CD1B6F1 wild-type mice (WT+ DualAAV-TS) compared to non-injected control CD1B6F1 wild-type animals (WT controls, P23-29). SP: summating receptor potential, wave I: auditory nerve activity, wave II: cochlear nucleus activity, wave III: superior olivary complex activity, wave IV-V: lateral lemniscus activity in the brainstem.

**B** ABR click sound (**right**) and tone burst (**left**) thresholds in otofelin dual-AAV-TS injected and contralateral non-injected ears of wild-type animals compared to non-injected control wild-type mice.

**C, D** ABR wave I (**C**) and summed ABR wave I-V (**D**) amplitudes at different click sound intensities in otofelin dual-AAV-TS injected and non-injected contralateral ears of wild-type mice. Non-injected wild-type mice served as controls.

**E** ABR wave I-V latencies at different click sound intensities measured from otofelin dual-AAV-TS injected and non-injected contralateral ears of wild-type mice. SPL PE: sound pressure level peak equivalent.

Data information: In (A-E), data are presented as mean  $\pm$  SEM.

**Appendix Table S1. Statistical tests and *P*-values**

**Fig 1D.**

| Group compared                                              | Statistical significance | <i>P</i> value | Statistical test                        |
|-------------------------------------------------------------|--------------------------|----------------|-----------------------------------------|
| DualAAV-TS:<br>N-term Otoferlin<br>vs.<br>C-term Otoferlin  | **                       | 0.002          | Wilcoxon matched-pair signed rank test  |
| DualAAV-Hyb:<br>N-term Otoferlin<br>vs.<br>C-term Otoferlin | **                       | 0.004          | Wilcoxon matched-pair signed rank test  |
| N-term Otoferlin:<br>DualAAV-TS<br>vs.<br>DualAAV-Hyb       | *                        | 0.02           | Unpaired t-test with Welch's correction |
| C-term Otoferlin:<br>DualAAV-TS<br>vs.<br>DualAAV-Hyb       | *                        | 0.05           | Unpaired t-test with Welch's correction |

**Fig 1E.**

| Group compared                                                                                             | Statistical significance | <i>P</i> value       | Statistical test                                                |
|------------------------------------------------------------------------------------------------------------|--------------------------|----------------------|-----------------------------------------------------------------|
| N-term Otoferlin:                                                                                          |                          |                      |                                                                 |
| WTB6 - AAV<br>vs.<br>WTCD1B6F1 + AAV.eGFP                                                                  | ns                       | > 0.999999           | Kruskal-Wallis test followed by Dunn's multiple comparison test |
| WTB6 - AAV<br>vs.<br>WTCD1B6F1 + DualAAV-TS                                                                | ***                      | 2x10 <sup>-6</sup>   | Kruskal-Wallis test followed by Dunn's multiple comparison test |
| WTB6 - AAV<br>vs.<br><i>Otof</i> <sup>-/-</sup> CD1B6F1 + DualAAV-TS                                       | ***                      | 0.0008               | Kruskal-Wallis test followed by Dunn's multiple comparison test |
| WTB6 - AAV<br>vs.<br><i>Otof</i> <sup>-/-</sup> CD1B6F1 + DualAAV-Hyb                                      | ***                      | < 1x10 <sup>-6</sup> | Kruskal-Wallis test followed by Dunn's multiple comparison test |
| WTB6 - AAV<br>vs.<br><i>Otof</i> <sup>-/-</sup> CD1B6F1 - AAV                                              | ***                      | < 1x10 <sup>-6</sup> | Kruskal-Wallis test followed by Dunn's multiple comparison test |
| <i>Otof</i> <sup>-/-</sup> CD1B6F1 + DualAAV-TS<br>vs.<br><i>Otof</i> <sup>-/-</sup> CD1B6F1 + DualAAV-Hyb | ns                       | > 0.999999           | Kruskal-Wallis test followed by Dunn's multiple comparison test |
| <i>Otof</i> <sup>-/-</sup> CD1B6F1 + DualAAV-TS<br>vs.<br><i>Otof</i> <sup>-/-</sup> CD1B6F1 - AAV         | ***                      | < 1x10 <sup>-6</sup> | Kruskal-Wallis test followed by Dunn's multiple comparison test |
| <i>Otof</i> <sup>-/-</sup> CD1B6F1 + DualAAV-Hyb<br>vs.<br><i>Otof</i> <sup>-/-</sup> CD1B6F1 - AAV        | ***                      | < 1x10 <sup>-6</sup> | Kruskal-Wallis test followed by Dunn's multiple comparison test |

| C-term Otoferlin:                                                                                          |     |                      |                                                                    |
|------------------------------------------------------------------------------------------------------------|-----|----------------------|--------------------------------------------------------------------|
| WTB6 - AAV<br>vs.<br>WTC1B6F1 + AAV.eGFP                                                                   | **  | 0.004                | Kruskal-Wallis test followed by<br>Dunn's multiple comparison test |
| WTB6 - AAV<br>vs.<br>WTC1B6F1 + DualAAV-TS                                                                 | *   | 0.031                | Kruskal-Wallis test followed by<br>Dunn's multiple comparison test |
| WTB6 - AAV<br>vs.<br><i>Otof</i> <sup>-/-</sup> CD1B6F1 + DualAAV-TS                                       | *** | 1x10 <sup>-5</sup>   | Kruskal-Wallis test followed by<br>Dunn's multiple comparison test |
| WTB6 - AAV<br>vs.<br><i>Otof</i> <sup>-/-</sup> CD1B6F1 + DualAAV-Hyb                                      | *** | < 1x10 <sup>-6</sup> | Kruskal-Wallis test followed by<br>Dunn's multiple comparison test |
| WTB6 - AAV<br>vs.<br><i>Otof</i> <sup>-/-</sup> CD1B6F1 - AAV                                              | *** | < 1x10 <sup>-6</sup> | Kruskal-Wallis test followed by<br>Dunn's multiple comparison test |
| <i>Otof</i> <sup>-/-</sup> CD1B6F1 + DualAAV-TS<br>vs.<br><i>Otof</i> <sup>-/-</sup> CD1B6F1 + DualAAV-Hyb | ns  | > 0.999999           | Kruskal-Wallis test followed by<br>Dunn's multiple comparison test |
| <i>Otof</i> <sup>-/-</sup> CD1B6F1 + DualAAV-TS<br>vs.<br><i>Otof</i> <sup>-/-</sup> CD1B6F1 - AAV         | *** | < 1x10 <sup>-6</sup> | Kruskal-Wallis test followed by<br>Dunn's multiple comparison test |
| <i>Otof</i> <sup>-/-</sup> CD1B6F1 + DualAAV-Hyb<br>vs.<br><i>Otof</i> <sup>-/-</sup> CD1B6F1 - AAV        | *** | < 1x10 <sup>-6</sup> | Kruskal-Wallis test followed by<br>Dunn's multiple comparison test |

**Fig 2B.**

| Group compared                                                      | Statistical significance | P value              | Statistical test                                                      |
|---------------------------------------------------------------------|--------------------------|----------------------|-----------------------------------------------------------------------|
| WTB6<br>vs.<br>WTC1B6F1 +AAV                                        | ns                       | > 0.999999           | Kruskal-Wallis test<br>followed by Dunn's multiple<br>comparison test |
| WTB6<br>vs.<br><i>Otof</i> <sup>-/-</sup> + DualAAV-TS              | ***                      | < 1x10 <sup>-6</sup> | Kruskal-Wallis test<br>followed by Dunn's multiple<br>comparison test |
| WTB6<br>vs.<br><i>Otof</i> <sup>-/-</sup> + DualAAV-Hyb             | ***                      | < 1x10 <sup>-6</sup> | Kruskal-Wallis test<br>followed by Dunn's multiple<br>comparison test |
| WTB6<br>vs.<br><i>Otof</i> <sup>-/-</sup> - AAV<br>injected ear     | ***                      | < 1x10 <sup>-6</sup> | Kruskal-Wallis test<br>followed by Dunn's multiple<br>comparison test |
| WTB6<br>vs.<br><i>Otof</i> <sup>-/-</sup> - AAV<br>non-injected ear | ***                      | < 1x10 <sup>-6</sup> | Kruskal-Wallis test<br>followed by Dunn's multiple<br>comparison test |
| WTC1B6F1 + AAV<br>vs.<br><i>Otof</i> <sup>-/-</sup> + DualAAV-TS    | ***                      | < 1x10 <sup>-6</sup> | Kruskal-Wallis test<br>followed by Dunn's multiple<br>comparison test |

|                                                                                                                 |     |                      |                                                                       |
|-----------------------------------------------------------------------------------------------------------------|-----|----------------------|-----------------------------------------------------------------------|
| WTCD1B6F1 + AAV<br>vs.<br><i>Otof</i> <sup>-/-</sup> + DualAAV-Hyb                                              | *** | < 1x10 <sup>-6</sup> | Kruskal-Wallis test<br>followed by Dunn's multiple<br>comparison test |
| WTCD1B6F1 + AAV<br>vs.<br><i>Otof</i> <sup>-/-</sup> - AAV<br>injected ear                                      | *** | < 1x10 <sup>-6</sup> | Kruskal-Wallis test<br>followed by Dunn's multiple<br>comparison test |
| WTCD1B6F1 + AAV<br>vs.<br><i>Otof</i> <sup>-/-</sup> - AAV<br>non-injected ear                                  | *** | < 1x10 <sup>-6</sup> | Kruskal-Wallis test<br>followed by Dunn's multiple<br>comparison test |
| <i>Otof</i> <sup>-/-</sup> + DualAAV-TS<br>vs.<br><i>Otof</i> <sup>-/-</sup> + DualAAV-Hyb                      | ns  | > 0.999999           | Kruskal-Wallis test<br>followed by Dunn's multiple<br>comparison test |
| <i>Otof</i> <sup>-/-</sup> + DualAAV-TS<br>vs.<br><i>Otof</i> <sup>-/-</sup> - AAV<br>injected ear              | ns  | > 0.999999           | Kruskal-Wallis test<br>followed by Dunn's multiple<br>comparison test |
| <i>Otof</i> <sup>-/-</sup> + DualAAV-TS<br>vs.<br><i>Otof</i> <sup>-/-</sup> - AAV<br>non-injected ear          | ns  | > 0.999999           | Kruskal-Wallis test<br>followed by Dunn's multiple<br>comparison test |
| <i>Otof</i> <sup>-/-</sup> + DualAAV-Hyb<br>vs.<br><i>Otof</i> <sup>-/-</sup> - AAV<br>injected ear             | ns  | 0.32                 | Kruskal-Wallis test<br>followed by Dunn's multiple<br>comparison test |
| <i>Otof</i> <sup>-/-</sup> + DualAAV-Hyb<br>vs.<br><i>Otof</i> <sup>-/-</sup> - AAV<br>non-injected ear         | ns  | > 0.999999           | Kruskal-Wallis test<br>followed by Dunn's multiple<br>comparison test |
| <i>Otof</i> <sup>-/-</sup> - AAV<br>injected ear<br>vs.<br><i>Otof</i> <sup>-/-</sup> - AAV<br>non-injected ear | ns  | > 0.999999           | Kruskal-Wallis test<br>followed by Dunn's multiple<br>comparison test |

**Fig 2D.**

| Group compared                                       | Statistical significance | P value              | Statistical test                                                      |
|------------------------------------------------------|--------------------------|----------------------|-----------------------------------------------------------------------|
| WT B6 P6<br>vs.<br><i>Otof</i> <sup>-/-</sup> B6 P6  | **                       | 0.002                | Kruskal-Wallis test<br>followed by Dunn's multiple<br>comparison test |
| WT B6 P6<br>vs.<br>WT B6 P14                         | ***                      | < 1x10 <sup>-6</sup> | Kruskal-Wallis test<br>followed by Dunn's multiple<br>comparison test |
| WT B6 P6<br>vs.<br><i>Otof</i> <sup>-/-</sup> B6 P14 | ***                      | < 1x10 <sup>-6</sup> | Kruskal-Wallis test<br>followed by Dunn's multiple<br>comparison test |



|                                                                              |     |                      |                                                                       |
|------------------------------------------------------------------------------|-----|----------------------|-----------------------------------------------------------------------|
| <i>Otof</i> <sup>-/-</sup> B6 P6<br>vs.<br>WT B6 P14                         | *** | < 1x10 <sup>-6</sup> | Kruskal-Wallis test<br>followed by Dunn's multiple<br>comparison test |
| <i>Otof</i> <sup>-/-</sup> B6 P6<br>vs.<br><i>Otof</i> <sup>-/-</sup> B6 P14 | *** | < 1x10 <sup>-6</sup> | Kruskal-Wallis test<br>followed by Dunn's multiple<br>comparison test |
| WT B6 P14<br>vs.<br><i>Otof</i> <sup>-/-</sup> B6 P14                        | ns  | 0.37                 | Kruskal-Wallis test<br>followed by Dunn's multiple<br>comparison test |

**Fig 2G.**

| 20 ms depolarization                                                         |                          |                      |                                                                |
|------------------------------------------------------------------------------|--------------------------|----------------------|----------------------------------------------------------------|
| Group compared                                                               | Statistical significance | P value              | Statistical test                                               |
| WTB6<br>vs.<br>WTCD1B6F1<br>vs.<br><i>Otof</i> <sup>-/-</sup> + DualAAV-TS   | ns                       | 0.3                  | One-way ANOVA                                                  |
| <i>Otof</i> <sup>-/-</sup> + DualAAV-TS<br>vs.<br><i>Otof</i> <sup>-/-</sup> | ***                      | <1x10 <sup>-4</sup>  | t-test (unpaired, two-tailed)                                  |
| 20-100ms vesicle replenishment rate                                          |                          |                      |                                                                |
| <i>Otof</i> <sup>-/-</sup> + DualAAV-TS<br>vs.<br><i>Otof</i> <sup>-/-</sup> | ***                      | < 1x10 <sup>-4</sup> | t-test (two-tailed, unpaired)                                  |
| WTCD1B6F1<br>vs.<br><i>Otof</i> <sup>-/-</sup> + DualAAV-TS                  | ***                      | 0.0005               | One-way ANOVA followed by Sidak's<br>multiple comparisons test |
| WTB6<br>vs.<br><i>Otof</i> <sup>-/-</sup> + DualAAV-TS                       | ***                      | <1x10 <sup>-4</sup>  | One-way ANOVA followed by Sidak's<br>multiple comparisons test |

**Fig 3C.**

| Group compared                                                                             | Statistical significance | P value    | Statistical test                                                      |
|--------------------------------------------------------------------------------------------|--------------------------|------------|-----------------------------------------------------------------------|
| WT + AAV.eGFP<br>vs.<br>WT + DualAAV-TS                                                    | ns                       | > 0.999999 | Kruskal-Wallis test<br>followed by Dunn's multiple<br>comparison test |
| WT + AAV.eGFP<br>vs.<br><i>Otof</i> <sup>-/-</sup> + DualAAV-TS                            | ***                      | 0.00002    | Kruskal-Wallis test<br>followed by Dunn's multiple<br>comparison test |
| WT + AAV.eGFP<br>vs.<br><i>Otof</i> <sup>-/-</sup> + DualAAV-Hyb                           | ***                      | 0.00013    | Kruskal-Wallis test<br>followed by Dunn's multiple<br>comparison test |
| <i>Otof</i> <sup>-/-</sup> + DualAAV-TS<br>vs.<br><i>Otof</i> <sup>-/-</sup> + DualAAV-Hyb | ns                       | > 0.999999 | Kruskal-Wallis test<br>followed by Dunn's multiple<br>comparison test |

**Fig 3F.**

| Group     | Statistical significance | <i>P</i> value + correlation coefficient | Correlation test          |
|-----------|--------------------------|------------------------------------------|---------------------------|
| 50 dB SPL | ns                       | <i>P</i> = 0.24<br><i>r</i> = 0.54       | Spearman correlation test |
| 70 dB SPL | *                        | <i>P</i> = 0.04<br><i>r</i> = 0.78       | Pearson correlation test  |
| 90 dB SPL | *                        | <i>P</i> = 0.02<br><i>r</i> = 0.84       | Pearson correlation test  |

**Fig EV5C.**

| Group                                   | Statistical significance | <i>P</i> value + correlation coefficient | Correlation test          |
|-----------------------------------------|--------------------------|------------------------------------------|---------------------------|
| <i>Otof</i> <sup>-/-</sup> + DualAAV-TS | ns                       | <i>P</i> = 0.50<br><i>r</i> = - 0.41     | Spearman correlation test |
